# Supplementary material
Source: Springer Nature journal article supplement (https://www.springermedizin.de/resource/supplementary/12958_2009_604_MOESM5_ESM.pdf/9568080)

### CD8

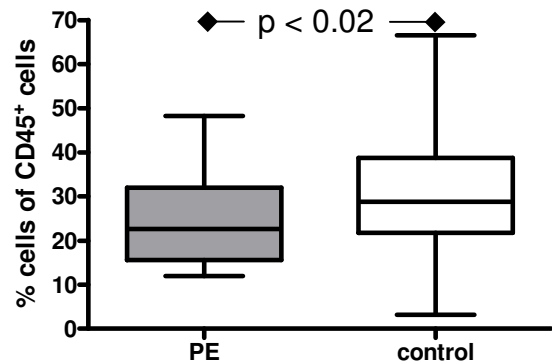

### $\alpha\beta$ -T cell receptor

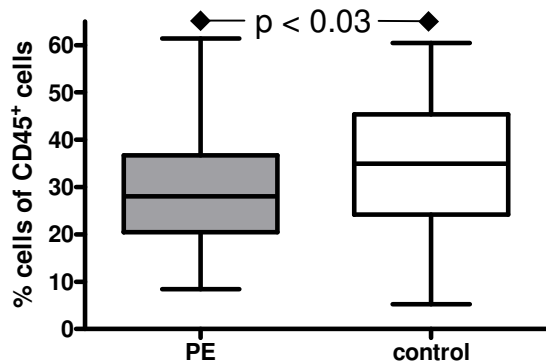

### CD4

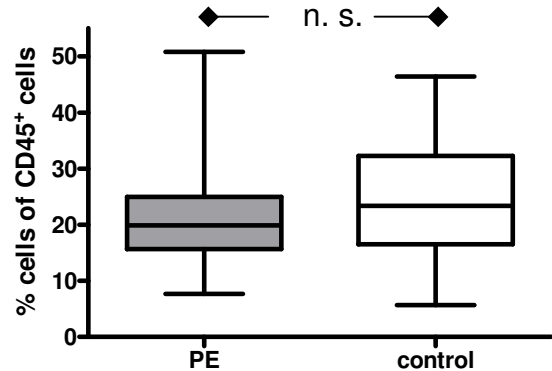

### $\gamma\delta$ -T cell receptor

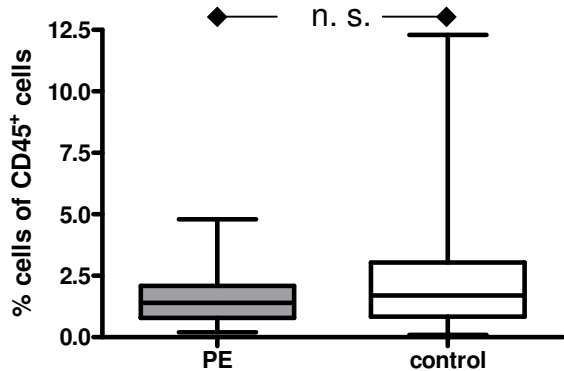

### CD25

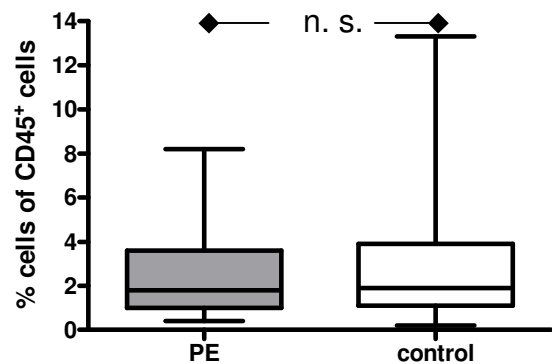

### CD19

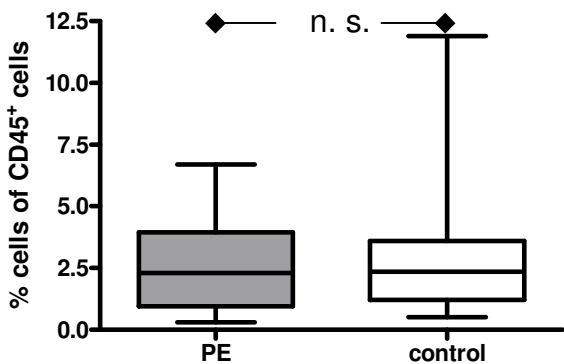

Supplement: MOESM5 [file 9568080]
